# Supplementary material
Source: publisher figshare collection journal article supplement (https://sage.figshare.com/ndownloader/files/45129686)
Supplement: Supplementary file 1 [file 45129686]

## Sheet: Sheet1
App information	Google Play			AppStore
App Name	Nr installs	Reviews*	Nr reviews	Rating*	Nr of ratings
CommonHealth	100000	4.6	5970	NA	NA
Surokkha	5000000	4.1	17538	NA	NA
EarthMed GO	100	NA	NA	NA	NA
United Airlines	10000000	4.6	366904	4.8	4978659
CLEAR	1000000	4.4	54700	4.7	450011
ArriveCAN	5000000	4.5	251643	4.7	381394
Healthy Together	1000000	4.7	54038	4.9	172101
myColorado	100000	4.2	6281	4.7	62604
Tawakkalna (Covid-19 KSA)	10000000	3.8	733913	3.7	12671
Aarogya Setu	100000000	3.3	1676144	4.2	5593
NYS Excelsior Pass Wallet	1000000	4.3	8699	2.6	3015
EHTERAZ	5000000	3.6	67298	3.2	2717
PeduliLindungi	50000000	3.6	1038150	1.7	853
PC-Covid	10000000	2.9	373287	2	738
MySejahtera	10000000	3	909675	4.1	737
LA Wallet	500000	4.2	2003	3.6	704
TousAntiCovid	10000000	3.7	231811	4.3	548
Immune	1000000	3.8	14662	3.3	479
NYC COVID SAFE	100000	4.3	420	3	349
LeaveHomeSafe	1000000	2.6	63617	1.5	339
My Bindle	50000	1.9	222	2.2	334
Alhosn	10000000	3.9	52777	2.7	271
ConecteSUS	10000000	4.2	189799	3.6	244
Life Fits Home	10000000	4	238968	2.5	224
Egypt Health Passport	100000	1.7	3426	2.3	90
TraceTogether	1000000	3.6	57137	2.3	71
DHA	1000000	4	6831	3.1	70
Coronavirus UY	1000000	3.7	12712	3.4	65
NHS App	10000000	3.2	31032	2.8	52
Covid Cert	5000000	3.1	9355	3.4	51
Pak Vaccination Pass	500000	4	1714	3.3	50
CANImmunize	100000	3.9	943	4.6	46
หมอพร้อม	10000000	3.3	89930	1.6	43
401Health	50000	3.1	412	2.5	35
e-Tǝbib	1000000	2.3	6977	2.1	35
VaxiCode	1000000	2.9	6660	3.2	32
HMH Well	10000	3.3	217	2.8	28
Service NSW	1000000	3.4	21083	3.6	24
PocketVAX	100	NA	NA	4.2	23
Coronapas	1000000	1.7	9143	2.7	18
NLVaxPass	100000	NA	NA	2.7	18
Tarassud+	1000000	2.9	10170	3.4	16
Tečka	1000000	2.5	7778	3.6	13
Siqi	1000	4.5	20	5	3
immuny	50000	NA	NA	3.3	3
COVIDCert NI	100000	NA	NA	3	2
Navus Health	100	NA	NA	3	2
GHA COVID Pass	10000	NA	NA	3	1
mojelKP	1000000	NA	NA	4	1
Average			161806		132073
Median			14662		70.5
Q1			6281		25
Q2			89930		728.75
IQR			83649		703.75
*:	Darker green cell color illustrates higher review/rating, darker red illustrates lower review/rating.
	Click on column header to toggle view list ascending/descending

## Sheet: Sheet 2
App information				Google Play					AppStore					Exodus Privacy				Permissions Accumulated Risk Score	Readability			Privacy Transparency Index
AppName ID	Country, State	Sponsor	Type of sponsor	Nr installs	Reviews	Nr reviews	Current version	Requires Android	Rating	Nr of ratings	Launch date	Category	Requires iOS	Nr of trackers	Nr of permissions	Nr of dangerous permissions	% dangerous	PARS	Grade level	Reading level	Readers' age	PTI
Bharatpur Metropolitan | COVID-19 Response System	Nepal	SmartPalika - स्मार्ट बन्दैछ नेपाल!	Government	5,000+	4.1	12	0.1.9	5.1 and up	NA	NA	NA	NA	NA	1	35	6	0.171429	50	11	Fairly difficult to read	15-17 yrs. old (Tenth to Eleventh graders)	5
Bardghat Municipality - COVID-19/Disaster Response	Nepal	SmartPalika - स्मार्ट बन्दैछ नेपाल!	Government	500+	5	1	0.0.5	4.4 and up	NA	NA	NA	NA	NA	1	28	6	0.214286	43	11	Fairly difficult to read	15-17 yrs. old (Tenth to Eleventh graders)	5
The Territory Check In	Australia, Northern Territory	Northern Territory of Australia	Government	100,000+	3.2	155	1.12.0	5.0 and up	NA	NA	2020-12-01	Health & Fitness	11.0 or later	0	23	3	0.130435	29	7	Standard / average	11-13 yrs. old (Sixth and Seventh graders)	5
‎Check in TAS	Australia, Tasmania	Department of Health Tasmania	Government	100,000+	3.3	388	1.12.0	5.0 and up	NA	NA	2020-12-01	Health & Fitness	11.0 or later	0	7	1	0.142857	9	16	Very difficult to ready	College graduate	5
Tô de Olho	Brazil, Rio Grande do Norte	Ministerio Púbico do Estado do Rio Grande do Norte	Government	10,000+	3.5	221	2.5	4.1 and up	3.8	4	2020-06-19	Utilities	8.0 or later	2	38	7	0.184211	58	13	Difficult to read	18-19 yrs. old (college level entry)	10
Coronavirus Algérie	Algeria	Algerian Ministry of Startups	Government	100,000+	2.7	758	1.0.3	4.1 and up	NA	NA	NA	NA	NA	1	24	6	0.25	39	11	Fairly difficult to read	15-17 yrs. old (Tenth to Eleventh graders)	10
Nepal Trace	Nepal	Pradesh 5	Private	500+	3	7	3.0.3	5.0 and up	NA	NA	NA	NA	NA	6	14	1	0.0714286	34	11	Fairly difficult to read	15-17 yrs. old (Tenth to Eleventh graders)	20
Lao KYC	Laos	SB Lab 856 Co., Ltd	Private	100,000+	2.4	3275	1.3.1	5.0 and up	5	1	2020-05-08	Utilities	11.0 or later	2	14	5	0.357143	30	11	Fairly difficult to read	15-17 yrs. old (Tenth to Eleventh graders)	20
CRUSH COVID RI	United States, RI	State of Rhode Island	Government	10,000+	3.4	328	4	8.0 and up	3.6	197	2020-05-18	Health & Fitness	11.0 or later	3	8	1	0.125	19	14	Difficult to read	21-22 yrs. old (college level)	20
Corona Watch	India, Karnataka	Karnataka State Remote Sensing Application Centre	Government	500,000+	2.6	2150	1.09	4.2 and up	2	46	2020-04-23	Navigation	12.0 or later	0	8	5	0.625	18	9	Fairly difficult to read	13-15 yrs. old (Eighth and Ninth graders)	20
BlueZone	Vietnam	AUTHORITY OF INFORMATION TECHNOLOGY APPLICATION	Government	10,000,000+	2.6	306089	4.0.8	6.0 and up	3.3	50100	2020-04-18	Health & Fitness	10.3 or later	3	38	7	0.184211	61	11	Fairly difficult to read	15-17 yrs. old (Tenth to Eleventh graders)	25
Coronavirus UY	Uruguay	Agencia de gobierno electrònico y sociedad de la informaciòn	Government	1,000,000+	3.9	9409	7.5.2	5.0 and up	3.5	57	2020-03-20	Utilities	10.0 or later	4	29	4	0.137931	49	11	Fairly difficult to read	15-17 yrs. old (Tenth to Eleventh graders)	25
ALHOSN	UAE, Dubai	Ministry of health-UAE	Government	5,000,000+	4.3	39238	3.1.1	5.0 and up	2.5	103	2020-04-15	Medical	11.0 or later	2	10	2	0.2	20	15	Difficult to read	College graduate	25
Exposure Notifications Settings Feature - MA	USA, Massachusetts	MA Department of Public Health	Government	1,000,000+	1.8	1526	minted1000013-v3	5.0 and up	NA	NA	NA	NA	NA	0	6	0	0	6	16	Very difficult to ready	College graduate	25
Protégete Panamá	Panama	MINISTERIO DE SALUD PANAMA	Government	100,000+	3.9	287	minted1000003	5.0 and up	NA	NA	NA	NA	NA	0	6	0	0	6	19	Very difficult to ready	College graduate	25
Taiwan Social Distancing	Taiwan	Taiwan Artificial Intelligence Laboratory (Taiwan AI Labs), Taiwan CDC	Non-profit	1,000,000+	NA	NA	1.5.0	6.0 and up	3.9	50	2021-04-16	Utilities	12.5 or later	0	6	0	0	6	23	Very difficult to ready	College graduate	25
TraceCovid	UAE, Abu Dhabi	Department of Health Abu Dhabi	Government	100,000+	3	340	1.1.6	5.1 and up	4.1	89	2020-03-04	Medical	11.0 or later	2	13	2	0.153846	23	14	Difficult to read	21-22 yrs. old (college level)	30
COVID Alert NJ	United States, NJ	State of New Jersey Applications; New Jersey Department of Treasury	Government	100,000+	3.8	984	1.1.4	6.0 and up	3.6	310	2020-09-29	Medical	13.7 or later	0	7	0	0	7	11	Fairly difficult to read	15-17 yrs. old (Tenth to Eleventh graders)	30
COVID Alert PA	United States, PA	Executive Office of The Commonwealth of Pennsylvania	Government	500,000+	3.5	1553	2.0.0	6.0 and up	4	322	2020-09-21	Medical	13.0 or later	0	7	0	0	7	11	Fairly difficult to read	15-17 yrs. old (Tenth to Eleventh graders)	30
COVID Alert CT	United States, CT	CT Department of Public Health	Government	100,000+	3.9	301	mined1000003	5.0 and up	NA	NA	NA	NA	NA	0	6	0	0	6	12	Difficult to read	17-18 yrs. old (Twelfth graders)	30
MI COVID Alert	United States, MI	State of Michigan	Government	100,000+	3	843	1.4	6.0 and up	3.9	258	2020-10-14	Health & Fitness	13.7 or later	0	6	0	0	6	13	Difficult to read	18-19 yrs. old (college level entry)	30
e-Tabib	Azerbaijan	Data Processing Center of the Ministry of Communications and High Technologies	Government	1,000,000+	3.7	5298	1.8.22	5.0 and up	2.5	469	2020-05-25	Health & Fitness	11.0 or later	6	16	4	0.25	42	12	Difficult to read	17-18 yrs. old (Twelfth graders)	35
AMAN	Hashemite Kingdom of Jordan	Jordan eGov Program	Government	1,000,000+	3	7787	1.1	5.0 and up	3.4	157	2020-05-30	Reference	9.0 or later	4	22	3	0.136364	40	12	Difficult to read	17-18 yrs. old (Twelfth graders)	35
NOVID	United States, Allegheny County, PA	Expii, Inc.	Private	10,000+	4.3	246	5.1.0	6.0 and up	4.7	237	2020-11-05	Health & Fitness	12.0 or later	2	16	3	0.1875	28	12	Difficult to read	17-18 yrs. old (Twelfth graders)	35
Self Safety	Uzbekistan	Center UZINFOCOM SUE	Government	500+	NA	NA	0.2.46	4.1 and up	5	1	2020-09-08	Utilities	9.0 or later	1	13	4	0.307692	24	9	Fairly difficult to read	13-15 yrs. old (Eighth and Ninth graders)	35
Care19 Alert	United States, ND, WY	ProudCrowd, LLC	Private	10,000+	3.9	161	1.2	6.0 and up	4.3	20	2020-12-08	Medical	13.6 or later	3	8	0	0	17	12	Difficult to read	17-18 yrs. old (Twelfth graders)	35
Госуслуги.COVID трекер	Russia	Ministry of digitization of Russia	Government	100,000+	3.2	684	1.1.0	6.0 and up	3	515	2020-11-22	Health & Fitness	13.5 or later	2	9	0	0	15	11	Fairly difficult to read	15-17 yrs. old (Tenth to Eleventh graders)	35
TRACE Taguig	Philippines	Dynamic Global Soft Inc.	Private	100,000+	4.2	536	2.1.5	4.4 and up	NA	NA	NA	NA	NA	0	2	1	0.5	4	11	Difficul to read	15-17 yrs. old (Tenth to Eleventh graders)	35
Gerak Malaysia	Malaysia	MALAYSIAN COMMUNICATIONS AND MULTIMEDIA COMMISSION	Government	1,000,000+	3.7	7540	2.6.73	5.0 and up	1.8	2600	2020-04-15	Health & Fitness	11.0 or later	4	24	7	0.291667	50	14	Difficult to read	21-22 yrs. old (college level)	40
HaMagen	Israel	Israel Ministry of Health	Government	1,000,000+	3.1	5289	2.2.28	5.0 and up	2.9	70	2020-03-22	Health & Fitness	10.0 or later	2	23	3	0.130435	35	13	Difficult to read	18-19 yrs. old (college level entry)	40
Safer Illinois	United States, IL	University of Illinois at Urbana-Champaign	Non-profit	10,000+	2.9	120	2.11.5	6.0 and up	2.7	204	2020-01-08	Health & Fitness	11.0 or later	0	19	5	0.263158	29	12	Difficult to read	17-18 yrs. old (Twelfth graders)	40
COVID-19MX	Mexico	Secretaría de Salud MX; INFOTEC, Centro de Investigacion e Innovacion en Tecnologias de la Informacion y Comunicacion	Multistakeholder (Non-profit; Government; Private)	1,000,000+	3.8	3823	Varies with device	6.0 and up	4.1	602	2020-06-04	Health & Fitness	11.0 or later	2	9	3	0.333333	21	19	Very difficult to ready	College graduate	40
Tabaud (COVID-19 KSA)	Saudi Arabia	National Information Center	Government	5,000,000+	4.5	19523	1.2.0	6.0 and up	4.4	5000	2020-12-06	Health & Fitness	13.5 or later	2	8	0	0	14	17	Very difficult to ready	College graduate	40
ASI	Ecuador	Ministerio de Telecomunicaciones Ecuador	Government	500,000+	3.1	1849	0.0.12-pilot	6.0 and up	4.3	12	2020-02-08	Health & Fitness	13.5 or later	0	7	0	0	7	16	Very difficult to ready	College graduate	40
NM Notify	USA, New Mexico	NM DOH	Government	50,000+	3.9	158	minted1000016	5.0 and up	NA	NA	NA	NA	NA	0	6	0	0	6	12	Difficult to read	17-18 yrs. old (Twelfth graders)	40
Hayat Eve Sığar	Turkey	Ministry of Health (T.C. Sağlık Bakanlığı)	Government	10,000,000+	4.2	231045	2.3.8	5.0 and up	3.3	18200	2020-04-14	Health & Fitness	10.0 or later	2	18	5	0.277778	34	15	Difficult to read	College graduate	45
Care19 Diary	United States, SD, ND, WY	ProudCrowd, LLC; State of North Dakota	Government	50,000+	3.2	281	3.1	6.0 and up	3.8	595	2020-07-04	Medical	13.0 or later	3	12	2	0.166667	25	12	Difficult to read	17-18 yrs. old (Twelfth graders)	45
SafeWA	Australia, Western Australia	Department of Health Western Australia	Government	500,000+	3.3	2897	1.1.1	5.0 and up	2.5	1400	2020-11-24	Medical	10.0 or later	1	10	2	0.2	17	10	Difficult to read	14-15 yrs. old (Ninth to Tenth graders)	45
Plan Jalisco Covid-19	Mexico, Jalisco	Gobierno del Estado de Jalisco	Government	5,000+	2.6	43	1.6	5.0 and up	5	2	2020-03-25	Health & Fitness	9.0 or later	1	6	1	0.166667	11	18	Very difficult to ready	College graduate	45
SlowCOVIDNC	United States, NC	NC Department of Health and Human Services	Government	100,000+	3.2	1331	1.6	6.0 and up	4.4	287	2020-09-21	Health & Fitness	13.7 or later	0	6	0	0	6	14	Difficult to read	21-22 yrs. old (college level)	45
careFIJI	Fiji	Government of the Republic of Fiji	Government	100,000+	4	2729	1.0.60	5.1 and up	3.2	66	2020-06-14	Medical	10.0 or later	4	30	4	0.133333	50	17	Very difficult to ready	College graduate	50
Rakning C-19	Iceland	Directorate of Health of Iceland (Embætti landlæknis)	Government	100,000+	4.4	513	2.0.6	5.0 and up	3	27	2020-02-04	Lifestyle	9.0 or later	4	19	4	0.210526	39	11	Fairly difficult to read	15-17 yrs. old (Tenth to Eleventh graders)	50
COVA Punjab	India, Punjab	Government of Punjab	Government	1,000,000+	3.7	36826	1.3.43	4.4 and up	3.5	1600	2020-08-05	Health & Fitness	10.3 or later	3	16	5	0.3125	35	15	Difficult to read	College graduate	50
TraceTogether	Singapore	Government Technology Agency	Government	1,000,000+	4.4	33924	2.10.0	5.1 and up	2.9	627	2020-03-18	Medical	10.0 or later	2	15	3	0.2	27	11	Fairly difficult to read	15-17 yrs. old (Tenth to Eleventh graders)	50
Coalition App | #StopCovid19	United States, Global	Nodle	Multistakeholder (Non-profit; Government; Private)	1,000+	4	32	2.0.1	6.0 and up	NA	NA	NA	NA	NA	3	12	2	0.166667	25	13	Difficult to read	18-19 yrs. old (college level entry)	50
StopKorona!	North Macedonia	Ministry of Information Society and Administration	Government	50,000+	3.5	331	1.1.1	5.0 and up	3.4	10	2020-12-04	Social Networking	11.0 or later	2	13	2	0.153846	23	13	Difficult to read	18-19 yrs. old (college level entry)	50
TraceEkee	Maldives	HPA Maldives; Indira Gandhi Memorial Hospital	Multistakeholder (Non-profit; Government; Private)	50,000+	2.9	167	1.0.2	5.1 and up	3.2	25	NA	Utilities	11.0 or later	2	11	1	0.0909091	19	10	Fairly difficult to read	14-15 yrs. old (Ninth to Tenth graders)	50
ViruSafe	Bulgaria	COUNCIL OF MINISTERS	Government	50,000+	2.8	1135	1.0.3	5.0 and up	3.8	193	2020-06-04	Health & Fitness	10.0 or later	2	9	1	0.111111	17	11	Fairly difficult to read	15-17 yrs. old (Tenth to Eleventh graders)	50
COVID Defense	USA, Louisiana	Sate of Louisiana	Government	50,000+	3.8	229	1.9.1	6.0 and up	4.4	53	NA	Health & Fitness	13.5 or later	2	8	0	0	14	13	Difficult to read	18-19 yrs. old (college level entry)	50
Guam Covid Alert	Guam	Otech Developer; Government of Guam Office of Technology	Government	10,000+	4.5	107	1.0.10	6.0 and up	4.2	42	2020-09-09	Utilities	13.5 or later	2	8	0	0	14	13	Difficult to read	18-19 yrs. old (college level entry)	50
Contak	Seychelles	Space 95	Multistakeholder (Government; Private)	5,000+	3.9	18	1.2.3	7.0 and up	NA	NA	NA	NA	NA	0	8	1	0.125	10	8	Fairly difficult to read	12-14 yrs. old (Seventh and Eighth graders)	50
E7mi	Tunisia	Observatoire National des Maladies Nouvelles et Emergentes Tunisie	Non-profit	100,000+	1.3	660	1.1	5.0 and up	5	2	2020-02-06	Medical	10.0 or later	0	8	1	0.125	10	10	Fairly difficult to read	14-15 yrs. old (Ninth to Tenth graders)	50
Oregon Exposure Notifications	United States, OR	Oregon Health Authority	Government	10,000+	4.2	35	minted1000003	5.0 and up	NA	NA	NA	NA	NA	0	6	0	0	6	13	Difficult to read	18-19 yrs. old (college level entry)	50
Beat COVID Gibraltar	Gibraltar	Gibraltar Health Authority	Government	10,000+	3.2	94	1.0.4	6.0 and up	4.1	17	2020-06-17	Medical	13.0 or later	0	4	0	0	4	11	Fairly difficult to read	15-17 yrs. old (Tenth to Eleventh graders)	50
BruHealth	Brunei Darussalam	E-Government National Center	Government	100,000+	4	3046	2.3.0	7.0 and up	3.3	234	2020-05-13	Health & Fitness	10.0 or later	0	42	12	0.285714	66	14	Difficult to read	21-22 yrs. old (college level)	55
SM-Covid19	Italy	Softmining Srl	Private	100,000+	3.2	881	5.1	5.0 and up	NA	NA	NA	NA	NA	5	37	7	0.189189	66	11	Fairly difficult to read	15-17 yrs. old (Tenth to Eleventh graders)	55
Citizen SafePass	USA, Los Angeles; San Joaquin	Sp0n Inc.	Private	50,000+	4.1	194	1.10.8	5.0 and up	NA	NA	NA	NA	NA	11	18	6	0.333333	63	13	Difficult to read	18-19 yrs. old (college level entry)	55
Aarogya Setu	India	National Informatics Centre eGov Mobile Apps	Government	100,000,000+	3.8	1619306	1.4.1	5.0 and up	4.4	287200	2020-02-04	Health & Fitness	10.3 or later	2	13	3	0.230769	25	14	Difficult to read	21-22 yrs. old (college level)	55
COVID-19.eus	Spain, Basque Country	Osakidetza	Multistakeholder (Non-profit; Government; Private)	100,000+	3.3	703	4.1	5.0 and up	2.6	176	2020-03-29	Utilities	12.0 or later	2	9	3	0.333333	21	14	Difficult to read	21-22 yrs. old (college level)	55
CUIDAR	Argentina	Presidencia de la Nación Argentina	Government	10,000,000+	1	71277	3.5.22	5.0 and up	2	2800	2020-03-28	Medical	13.0 or later	2	9	3	0.333333	21	10	Fairly difficult to read	14-15 yrs. old (Ninth to Tenth graders)	55
LeaveHomeSafe	Hong Kong	Office of the Government CIO of Hong Kong Special Administrative Regio, OGCIO, HKSARG	Government	1,000,000+	NA	NA	2.1.4	4.1 and up	1.8	89	2020-11-02	Health & Fitness	10.0 or later	0	9	1	0.111111	11	16	Difficult to read	College graduate	55
Coronavirus SUS	Brazil	Governo do Brasil	Government	10,000,000+	3.4	25159	2.2.1	5.0 and up	3.5	122	2020-10-07	Health & Fitness	13.5 or later	1	7	0	0	10	17	Very difficult to ready	College graduate	55
‎Check In Qld	Australia, Queensland	Queensland Government	Government	1,000,000+	3	3501	2.1.1	5.0 and up	1	1	2021-04-01	Health & Fitness	11.0 or later	0	7	1	0.142857	9	9	Fairly difficult to read	13-15 yrs. old (Eighth and Ninth graders)	55
COVID Alert NY	United States, NY	New York State Department of Health	Government	500,000+	3.8	2103	1.1.9	6.0 and up	4.6	551	2020-09-30	Health & Fitness	13.0 or later	0	7	0	0	7	12	Difficult to read	17-18 yrs. old (Twelfth graders)	55
StayAway COVID	Portugal	FCT - FUNDACAO PARA A CIENCIA E A TECNOLOGIA I.P.	Non-profit	1,000,000+	2.6	9941	1.1.4	6.0 and up	3.5	1100	2020-08-28	Medical	13.5 or later	0	7	0	0	7	14	Difficult to read	21-22 yrs. old (college level)	55
COVID Alert DE	United States, DE	Delaware Department of Health and Social Services	Government	50,000+	4.1	173	1.2.2	6.0 and up	4.2	33	2020-09-14	Medical	11.0 or later	0	6	0	0	6	9	Fairly difficult to read	13-15 yrs. old (Eighth and Ninth graders)	55
Mascarilla Digital	Costa Rica	Ministerio de Salud. Costa Rica	Government	1,000,000+	2.7	960	minted900009-v3	5.0 and up	NA	NA	NA	NA	NA	0	6	0	0	6	19	Very difficult to ready	College graduate	55
geoHealthApp Covid19 Tracker	Switzerland	Health Tech Cluster Switzerland	Multistakeholder (Non-profit; Government; Private)	1,000+	3.3	32	0.0.52	5.0 and up	3.6	8	2020-04-18	Medical	10.0 or later	1	27	12	0.444444	54	11	Fairly difficult to read	15-17 yrs. old (Tenth to Eleventh graders)	60
COVI-ID	South Africa	Council for Scientific and Industrial Research (CSIR)	Multistakeholder (Non-profit; Government; Private)	500+	3.2	5	1	5.0 and up	NA	NA	NA	NA	NA	2	16	6	0.375	34	17	Very difficult to ready	College graduate	60
PeduliLindungi	Indonesia	Kementerian Kominfo	Government	10,000,000+	3.6	573223	4.0.2	5.0 and up	2.1	354	2020-04-13	Health & Fitness	10.0 or later	2	14	5	0.357143	30	10	Difficult to read	14-15 yrs. old (Ninth to Tenth graders)	60
CovidRadar.mx	Mexico, Nuevo Leon	Incluyendo Mexico A.C.	Non-profit	50,000+	2.1	179	2.0.0	5.0 and up	3.8	4	2020-04-19	Health & Fitness	8.0 or later	1	10	3	0.3	19	14	Difficult to read	21-22 yrs. old (college level)	60
Smittestopp	Norway	Folkehelseinstituttet	Government	100,000+	2.3	2159	1.3.0	5.0 and up	3.5	2200	2020-04-16	Medical	10.0 or later	2	9	1	0.111111	17	12	Difficult to read	17-18 yrs. old (Twelfth graders)	60
CombatCOVID MDC	United States, Miami-Dade County, FL	Miami-Dade County	Government	1,000+	3.9	35	1.1.1	5.1 and up	3.2	53	2020-08-21	Health & Fitness	12.0 or later	1	10	1	0.1	15	11	Fairly difficult to read	15-17 yrs. old (Tenth to Eleventh graders)	60
CombatCOVID PBC	United States, Palm Beach County, CA	Palm Beach County BoCC	Government	10,000+	3.6	57	1.1.2	5.1 and up	2.7	35	2020-07-29	Health & Fitness	12.0 or later	1	10	1	0.1	15	12	Difficult to read	17-18 yrs. old (Twelfth graders)	60
AlohaSafe Alert	United States, HI	Hawaii Department of Health	Government	100,000+	3.6	197	1.0.15	6.0 and up	3.4	106	2020-10-11	Health & Fitness	13.5 or later	2	8	0	0	14	13	Difficult to read	18-19 yrs. old (college level entry)	60
COCOA COVID-19 Contact-Confirming Application	Japan	Ministry of Health, Labour and Welfare - Japan	Government	5,000,000+	2.4	22916	1.2.6	6.0 and up	1.9	72	2020-06-19	Medical	13.5 or later	2	6	0	0	12	13	Difficult to read	18-19 yrs. old (college level entry)	60
Koronavilkku	Finland	Terveyden ja hyvinvoinnin laitos	Government	1,000,000+	3.2	5790	2.4.2+8563660	6.0 and up	4.4	2100	2020-08-31	Medical	13.5 or later	0	7	0	0	7	12	Difficult to read	17-18 yrs. old (Twelfth graders)	60
CA Notify	United States, CA	CA Dept of Technology	Government	1,000,000+	3.8	1793	minted1000013	5.0 and up	NA	NA	NA	NA	NA	0	6	0	0	6	12	Difficult to read	17-18 yrs. old (Twelfth graders)	60
StaySafe PH	Philippines	Multisys Technologies Corporation	Private	1,000,000+	3.3	17887	3.0.10	6.0 and up	1.9	993	2020-05-24	Social Networking	13.0 or later	0	6	0	0	6	11	Fairly difficult to read	15-17 yrs. old (Tenth to Eleventh graders)	60
Everbridge Contact Tracer	United States, Western Oregon, Northern California and Southern Washington	Everbridge, Inc.	Private	500,000+	2.4	1622	21.3.2	6.0 and up	3	26	2020-11-09	Business	12.4 or later	4	27	8	0.296296	55	12	Difficult to read	17-18 yrs. old (Twelfth graders)	65
videmic Tracing	Germany, Bayreuth	videmic GmbH	Private	1,000+	4.7	23	1.0.37	7.0 and up	4.6	38	2020-11-12	Health & Fitness	12.3 or later	1	37	7	0.189189	54	12	Difficult to read	17-18 yrs. old (Twelfth graders)	65
TousAntiCovid (StopCovid France)	France	Gouvernement Francais	Government	10,000,000+	4.1	160920	3.8.2	5.0 and up	4.4	63300	2020-02-06	Health & Fitness	11.4 or later	0	12	3	0.25	18	15	Difficult to read	College graduate	65
eRouška	Czech Republic	Ministerstvo zdravotnictví České republiky	Government	1,000,000+	3.5	10310	2.3.757	6.0 and up	4.3	4000	2020-03-05	Health & Fitness	13.5 or later	2	8	0	0	14	12	Difficult to read	17-18 yrs. old (Twelfth graders)	65
eSalvar - Naga Contact Tracing for Establishments	Philippines	Nueca Technologies Inc.	Private	10,000+	4.2	43	1.3.4	5.0 and up	2.6	5	2020-09-09	Business	12.0 or later	2	6	1	0.166667	14	9	Fairly difficult to read	13-15 yrs. old (Eighth and Ninth graders)	65
WeHealth Bermuda	Bermuda	WeHealth Solutions PBC	Private	10,000+	4.4	45	2.1.11	6.0 and up	3.9	11	2020-11-23	Medical	13.6 or later	1	7	0	0	10	11	Fairly difficult to read	15-17 yrs. old (Tenth to Eleventh graders)	65
CO Exposure Notifications	United States, CO	Colorado Department of Public Health & Environment	Government	100,000+	3.7	895	minted1000003	5.0 and up	NA	NA	NA	NA	NA	0	6	0	0	6	15	Very difficult to ready	College graduate	65
Covid Watch Arizona	United States, AR	ADHS-Arizona Department of Health Services	Government	10,000+	3.7	143	2.1.11	6.0 and up	3.8	84	2020-08-18	Medical	13.6 or later	0	6	0	0	6	11	Fairly difficult to read	15-17 yrs. old (Tenth to Eleventh graders)	65
COVID-19 ERSDEL	Mongolia	Department of Communication and Information Technology	Government	100,000+	4.3	371	minted900009	5.0 and up	NA	NA	NA	NA	NA	0	6	0	0	6	8	Fairly difficult to read	12-14 yrs. old (Seventh and Eighth graders)	65
PathCheck SafePlaces (formerly COVID Safe Paths)	United States, Global	Path Check, Inc	Private	10,000+	4.2	76	1.3.1 (2)	5.0 and up	4.4	57	2020-03-05	Utilities	9.0 or later	1	37	5	0.135135	50	14	Difficult to read	21-22 yrs. old (college level)	70
Mahakavach	India, Maharashtra	Maharashtra State Innovation Society	Government	100,000+	3.6	1441	1.9	4.3 and up	NA	NA	NA	Health & Fitness	13.0 or later	2	20	8	0.4	42	13	Difficult to read	18-19 yrs. old (college level entry)	70
NZ COVID Tracer	New Zealand	Ministry of Health NZ	Government	1,000,000+	3.9	7278	6.0.0	6.0 and up	3.2	2200	2020-05-19	Health & Fitness	10.0 or later	2	29	3	0.103448	41	10	Fairly difficult to read	14-15 yrs. old (Ninth to Tenth graders)	70
Coronika	Germany	Kreativzirkel UG (haftungsbeschränkt)	Private	50,000+	3.9	457	2.1.1	4.4 and up	NA	NA	NA	NA	NA	1	26	4	0.153846	37	9	Fairly difficult to read	13-15 yrs. old (Eighth and Ninth graders)	70
Stop Covid	Republic of Georgia	Ministry of IDPs, Labour, Health, Social Affairs	Government	100,000+	3.7	724	1.0.467	5.0 and up	4.5	270	2020-12-04	Medical	11.0 or later	3	18	2	0.111111	31	13	Difficult to read	18-19 yrs. old (college level entry)	70
Healthy Together - COVID-19	United States, UT, FL	Twenty Holdings, Inc.	Private	1,000,000+	4.7	33979	1.6.3	7.0 and up	4.9	110800	2020-04-22	Health & Fitness	12.0 or later	3	14	2	0.142857	27	14	Difficult to read	21-22 yrs. old (college level)	70
Smitte|stop	Denmark	Sundheds- og Ældreministeriet	Government	500,000+	3.3	2573	2.4	6.0 and up	3.6	1100	2020-06-17	Medical	13.5 or later	0	22	2	0.0909091	26	11	Fairly difficult to read	15-17 yrs. old (Tenth to Eleventh graders)	70
Corona Tracer BD	Bangladesh	Mobile game & application project, ICT Division	Government	1,000,000+	3.9	5017	1.0.14	5.0 and up	NA	NA	NA	NA	NA	0	10	2	0.2	14	14	Difficult to read	21-22 yrs. old (college level)	70
GuideSafe	United States, AL	Alabama Department of Public Health	Government	100,000+	3.7	523	1.10.0	6.0 and up	4.4	102	2020-08-16	Health & Fitness	13.5 or later	2	8	0	0	14	9	Fairly difficult to read	13-15 yrs. old (Eighth and Ninth graders)	70
Stop COVID-19	Croatia	Republika Hrvatska Ministarstvo zdravstva	Government	100,000+	2.7	647	2.2.0	6.0 and up	4.5	91	2020-07-27	Health & Fitness	13.5 or later	2	8	0	0	14	13	Difficult to read	18-19 yrs. old (college level entry)	70
COVID Alert	Canada	Health Canada | Santé Canada	Government	1,000,000+	3.5	8782	1.5.3	6.0 and up	4.3	4900	2020-07-30	Medical	13.5 or later	0	8	0	0	8	8	standard / average	12-14 yrs. old (Seventh and Eighth graders)	70
StopCOVID NI	United Kingdom, Northern Ireland	Health & Social Care Northern Ireland	Government	100,000+	2.8	664	2.3.4	6.0 and up	3.4	403	2020-07-30	Medical	13.0 or later	0	7	0	0	7	14	Difficult to read	21-22 yrs. old (college level)	70
DC CAN	United States, DC	DC Exposure Notifications	Government	50,000+	4	148	minted1000007	5.0 and up	NA	NA	NA	NA	NA	0	6	0	0	6	11	Fairly difficult to read	15-17 yrs. old (Tenth to Eleventh graders)	70
WI Exposure Notification	USA, Wisconsin	State of Wisconsin - Department of Health Services	Government	100,000+	3.5	216	minted1000003	5.0 and up	NA	NA	NA	NA	NA	0	6	0	0	6	11	Difficult to read	15-17 yrs. old (Tenth to Eleventh graders)	70
Ehteraz	Qatar	Ministry Of Interior - Qatar	Government	1,000,000+	4.3	50253	11.1.0	6.0 and up	3.4	2300	2020-04-25	Health & Fitness	13.1 or later	7	20	7	0.35	55	16	Very difficult to ready	College graduate	75
STOP COVID - ProteGO Safe	Poland	Ministerstwo Cyfryzacji	Government	1,000,000+	4.4	19756	4.13.0	5.0 and up	4.6	6500	2020-04-30	Medical	12.1 or later	2	7	0	0	13	12	Difficult to read	17-18 yrs. old (Twelfth graders)	75
Coronalert	Belgium	Sciensano - Belgium	Non-profit	1,000,000+	3.4	5510	1.13.1	6.0 and up	4.3	9	2020-09-29	Health & Fitness	13.6 or later	0	7	0	0	7	11	Fairly difficult to read	15-17 yrs. old (Tenth to Eleventh graders)	75
Covid Trace Nevada	United States, NE	Nevada Division of Public and Behavioral Health	Government	100,000+	3.6	428	1.2.13	7.0 and up	2.7	186	2020-08-22	Medical	13.5 or later	0	7	0	0	7	10	Fairly difficult to read	14-15 yrs. old (Ninth to Tenth graders)	75
TOGO SAFE	Togo	Ministry of Posts, Digital Economy and Technological Innovations	Government	10,000+	3.8	57	1	5.0 and up	1.5	4	2020-01-08	Medical	12.0 or later	3	14	3	0.214286	29	14	Difficult to read	21-22 yrs. old (college level)	80
VírusRadar	Hungary	Kormányzati Informatikai Fejlesztési Ügynökség; Nextsense	Multistakeholder (Non-profit; Government; Private)	100,000+	3.2	466	1.0.0	5.0 and up	NA	NA	2020-05-29	Health & Fitness	10.0 or later	2	14	2	0.142857	24	12	Difficult to read	17-18 yrs. old (Twelfth graders)	80
COVIDSafe	Australia	Australian Department of Health	Government	1,000,000+	3.5	22747	2.8	5.0 and up	4	13800	2020-04-26	Health & Fitness	10.0 or later	1	11	2	0.181818	18	15	Difficult to read	College graduate	80
ABTraceTogether	Canada, Alberta	Government of the Province of Alberta	Government	100,000+	2.5	1209	2.3.0	6.0 and up	2	1000	2020-01-05	Health & Fitness	11.0 or later	0	11	2	0.181818	15	15	Difficult to read	College graduate	80
Apturi Covid Latvia	Latvia	Slimibu Profilakses un Kontroles Centrs (Center for Disease Prevention and Control)	Non-profit	100,000+	2.8	1389	1.1	6.0 and up	4.6	9	2020-05-28	Medical	13.5 or later	2	8	0	0	14	10	Fairly difficult to read	14-15 yrs. old (Ninth to Tenth graders)	80
Radar Covid	Spain	Ministerio de Asuntos Económicos y Transf. Digital	Government	5,000,000+	2.7	20299	1.4.2	6.0 and up	3.3	3500	2020-07-07	Health & Fitness	13.5 or later	0	10	0	0	10	15	Difficult to read	College graduate	80
Stopp Corona	Austria	Österreichisches Rotes Kreuz	Non-profit	500,000+	3.6	3918	2.1.4.1247-QA_266	6.0 and up	2.8	765	2020-03-27	Medical	13.5 or later	0	7	0	0	7	7	Standard / average	11-13 yrs. old (Sixth and Seventh graders)	80
COVID Alert South Africa	South Africa	Department of Health - South Africa	Government	1,000,000+	3.4	3399	1.4.1-gms	5.0 and up	3.4	23	2020-08-08	Medical	13.5 or later	0	6	0	0	6	8	standard / average	12-14 yrs. old (Seventh and Eighth graders)	80
Immuni	Italy	Ministero della Salute	Government	10,000,000+	3.1	55286	2.5.4	7.0 and up	3.3	72	2020-01-06	Medical	13.0 or later	0	6	0	0	6	12	Difficult to read	17-18 yrs. old (Twelfth graders)	80
MD COVID Alert	United States, MD	Maryland Department of Health	Government	100,000+	3.7	463	minted1000003	5.0 and up	NA	NA	NA	NA	NA	0	6	0	0	6	9	Fairly difficult to read	13-15 yrs. old (Eighth and Ninth graders)	80
MOPH Ma3an	Lebanon	Lebanese Ministry of Public Health	Government	50,000+	2.4	334	1.0.6	5.0 and up	2.1	25	2020-08-31	Medical	11.0 or later	4	29	3	0.103448	47	11	Fairly difficult to read	15-17 yrs. old (Tenth to Eleventh graders)	85
CovTracer	Cyprus	RISE Research Centre of Excellence; Deputy Ministry for Research, Innovation & Digital Policy	Government	10,000+	2.7	146	3.3.12	6.0 and up	4	29	2020-05-15	Health & Fitness	9.0 or later	2	8	0	0	14	11	Fairly difficult to read	15-17 yrs. old (Tenth to Eleventh graders)	85
Saqbol	Kazakhstan	National Information Technologies JSC	Government	500,000+	1.8	4094	1.0.8	6.0 and up	1.2	612	2020-04-09	Medical	13.5 or later	2	7	0	0	13	10	Fairly difficult to read	14-15 yrs. old (Ninth to Tenth graders)	85
#OstaniZdrav	Slovenia	National Institute of Public Health - NIJZ	Government	100,000+	3.1	2564	1.14.3	6.0 and up	NA	NA	2020-01-09	Health & Fitness	13.5 or later	0	7	0	0	7	13	Difficult to read	18-19 yrs. old (college level entry)	85
CoronaMelder	Netherlands	Government of the Netherlands (Rijksoverheid)	Government	1,000,000+	3.2	8713	2.4.3	6.0 and up	4.2	21	2020-11-08	Medical	13.5 or later	0	7	0	0	7	10	Fairly difficult to read	14-15 yrs. old (Ninth to Tenth graders)	85
COVID Alert Malta	Malta	Government of Malta; Malta IT Agency	Government	50,000+	4.1	175	2.0.1	6.0 and up	5	1	2020-09-17	Health & Fitness	13.5 or later	0	7	0	0	7	13	Difficult to read	18-19 yrs. old (college level entry)	85
HOIA	Estonia	TEHIK, Health and Welfare Information Systems Centre	Multistakeholder (Non-profit; Government; Private)	100,000+	3.1	1026	1.4.5	6.0 and up	5	4	2020-08-19	Health & Fitness	13.5 or later	0	7	0	0	7	10	Fairly difficult to read	14-15 yrs. old (Ninth to Tenth graders)	85
Jersey COVID Alert	United Kingdom, Jersey	Government of Jersey	Government	10,000+	3.6	69	1.0.8	6.0 and up	4.3	44	2020-10-13	Medical	13.0 or later	0	7	0	0	7	13	Difficult to read	18-19 yrs. old (college level entry)	85
Korona Stop LT	Lithuania	National Public Health Center under the Ministry of Health - Nacionalinis visuomenes sveikatos centras	Government	100,000+	3	1082	1.2.2	6.0 and up	4.2	254	2020-04-11	Medical	13.5 or later	0	7	0	0	7	9	Fairly difficult to read	13-15 yrs. old (Eighth and Ninth graders)	85
WA Notify	United States, WA	Washington Department of Health	Government	100,000+	3.7	826	minted1000003	5.0 and up	NA	NA	NA	NA	NA	0	6	0	0	6	14	Difficult to read	21-22 yrs. old (college level)	85
NHS COVID-19 App (pilot)	United Kingdom, Isle of Wight	NHS	Government	50,000+	NA	NA	Varies with device	Varies with device	5	2	2020-05-05	Medical	12.4 or later	3	12	2	0.166667	25	12	Difficult to read	17-18 yrs. old (Twelfth graders)	90
SwissCovid	Switzerland	Federal Office of Public Health FOPH	Government	1,000,000+	3.4	4506	2.2.0	6.0 and up	4.4	5400	2020-02-06	Medical	13.5 or later	0	11	1	0.0909091	13	12	Difficult to read	17-18 yrs. old (Twelfth graders)	90
Corona-Warn-App	Germany	Robert Koch-Institut	Non-profit	10,000,000+	3.5	135114	2.12.2	6.0 and up	4.1	53	2020-06-15	Health & Fitness	13.5 or later	0	8	1	0.125	10	10	Fairly difficult to read	14-15 yrs. old (Ninth to Tenth graders)	90
NHS COVID-19 App	United Kingdom	NHS	Government	10,000,000+	4.2	132496	4.19(246)	6.0 and up	4.7	1400	2020-05-05	Health & Fitness	10.0 or later	0	8	1	0.125	10	12	Difficult to read	17-18 yrs. old (Twelfth graders)	90
Protect Scotland	United Kingdom, Scotland	NHS Education for Scotland	Government	500,000+	2.8	3297	1.2.5	6.0 and up	5	4	2020-09-09	Medical	13.0 or later	0	6	0	0	6	14	Difficult to read	21-22 yrs. old (college level)	90
COVID Tracker Ireland	Ireland	Health Service Executive (HSE)	Government	1,000,000+	3.6	5466	1.0.7	6.0 and up	4.2	10	2020-06-07	Medical	11.0 or later	0	7	0	0	7	11	Fairly difficult to read	15-17 yrs. old (Tenth to Eleventh graders)	95
Shlonik	Kuwait	Kuwait Central Agency for Information Technology	Government	500,000+	4.1	2735	2.1.4	Varies with device	3.5	376	2020-10-04	Health & Fitness	10.0 or later	4	44	9	0.204545	74	NA	NA	NA	NA
SafeEntry - TraceTogether	Singapore	Government Technology Agency	Government	100,000+	4.3	1079	1.1.31	5.0 and up	3.2	57	2020-05-24	Utilities	10.0 or later	5	31	12	0.387097	70	NA	NA	NA	NA
HMushrif	Oman	Ministry of Health Apps	Government	50,000+	1.7	241	1.2.2	7.0 and up	2.2	10	2020-03-05	Medical	10.0 or later	2	41	9	0.219512	65	NA	NA	NA	NA
MorChana	Thailand	Digital Government Development Agency, Thailand	Government	5,000,000+	4.1	16373	2.0.5	5.0 and up	2.2	2300	2020-06-04	Utilities	9.0 or later	3	40	7	0.175	63	NA	NA	NA	NA
BeAware Bahrain	Bahrain	Information & eGovernment Authority	Government	1,000,000+	4.4	18097	0.5.9	4.4 and up	4.4	1400	2020-03-28	Health & Fitness	11.0 or later	2	39	8	0.205128	61	NA	NA	NA	NA
GH COVID-19 Tracker	Ghana	Ministry of Communications	Government	10,000+	3.7	42	1.0.5	5.0 and up	4	6	2020-04-26	Health & Fitness	9.0 or later	0	40	7	0.175	54	NA	NA	NA	NA
Private Kit	United States, Global	Massachusetts Institute of Technology	Non-profit	10,000+	3	167	0.5.19	5.0 and up	3.7	121	2020-03-16	Utilities	9.0 or later	1	34	4	0.117647	45	NA	NA	NA	NA
SwiftMED	Singapore	Swift Office LLP	Private	10,000+	3.2	107	2.2.4.1728	5.1 and up	2.9	32	2020-03-14	Productivity	11.0 or later	2	23	7	0.304348	43	NA	NA	NA	NA
CoBuddy - Covid19 Tool	Global	FaceTagR	Private	10,000+	3.8	41	3.006	5.1 and up	NA	NA	NA	NA	NA	3	18	6	0.333333	39	NA	NA	NA	NA
Tarassud+	Oman	Ministry of Health, Sultanate of Oman	Government	1,000,000+	3.9	8668	6.10.21	5.0 and up	3.6	9	2020-03-16	Medical	12.4 or later	3	19	5	0.263158	38	NA	NA	NA	NA
SMC COVID-19 Tracker	India, Surat Municipality	Surat Municipal Corporation (SMC)	Government	100,000+	3.6	528	1.3.3	4.1 and up	NA	NA	NA	NA	NA	2	16	7	0.4375	36	NA	NA	NA	NA
MyTrace	Malaysia	GOVERNMENT OF MALAYSIA	Government	100,000+	3.9	1017	1.0.30	6.0 and up	1.6	51	NA	Lifestyle	9.0 or later	2	15	4	0.266667	29	NA	NA	NA	NA
RC143	Philippines	Philippine Red Cross	Non-profit	100,000+	3.9	841	1.6.13	5.1 and up	4.5	42	2020-06-13	Medical	11.2 or later	3	13	2	0.153846	26	NA	NA	NA	NA
Aggie-COVID-19	USA, New Mexico	Son Tran; New Mexico State University Board of Regents	Multistakeholder (Non-profit; Private)	10+	5	1	1.0.6	4.1 and up	4	4	2020-04-09	Productivity	8.0 or later	0	17	4	0.235294	25	NA	NA	NA	NA
CoronApp	Colombia	Instituto Nacional de Salud	Government	10,000,000+	3.5	73793	1.2.69	5.1 and up	NA	NA	2020-03-20	Health & Fitness	10.3 or later	2	11	3	0.272727	23	NA	NA	NA	NA
COVIDTrace	Malaysia, Sarawak	Sarawak Government; State Service Modernisation Unit, Chief Minister's Department	Government	50,000+	3.2	147	2.1.0	5.1 and up	3.2	17	2020-05-05	Health & Fitness	10.0 or later	1	13	3	0.230769	22	NA	NA	NA	NA
Wiqaytna	Morocco	Ministère de l'Intérieur du Maroc	Government	1,000,000+	4.1	13326	1.2.2	5.0 and up	4.4	125	2020-05-26	Medical	10.0 or later	2	13	1	0.0769231	21	NA	NA	NA	NA
Druk Trace	Bhutan	G2C Office, Royal Government of Bhutan	Government	100,000+	4	2855	3.1	4.1 and up	2.8	8	2020-02-05	Health & Fitness	9.0 or later	0	9	3	0.333333	15	NA	NA	NA	NA
COVIDaware MN	United States, MN	State of Minnesota	Government	100,000+	3.3	671	1.6.1	6.0 and up	4.7	435	2020-11-21	Utilities	13.5 or later	2	8	0	0	14	NA	NA	NA	NA
BinD360	Philippines	Octa Engineer; City Government of Binan	Government	100,000+	3.6	1967	3.5	4.2 and up	3.3	117	2020-08-15	Health & Fitness	9.0 or later	1	8	1	0.125	13	NA	NA	NA	NA
Check In CBR	Australia, Canberra	ACT Health; Health Directorate	Government	100,000+	4.3	750	2.1.1	5.0 and up	NA	NA	2020-09-08	Medical	11.0 or later	0	7	1	0.142857	9	NA	NA	NA	NA
COVIDWISE	United States, VA	Virginia Department of Health	Government	500,000+	3.6	1640	1.5	6.0 and up	4.5	920	2020-05-08	Health & Fitness	13.5 or later	0	6	0	0	6	NA	NA	NA	NA
